# Supplementary material
Source: publisher figshare collection journal article supplement (https://frontiersin.figshare.com/ndownloader/files/12168764)
Supplement: Supplementary file [file 12168764]

### ***Supplementary Tables 1-3***

## **CD19<sup>+</sup>CD24<sup>hi</sup>CD38<sup>hi</sup> B cells are expanded in juvenile dermatomyositis and exhibit a pro-inflammatory phenotype after activation through toll-like receptor 7 and interferon- $\alpha$**

^Christopher JM Piper,<sup>1</sup> ^Meredyth GLI Wilkinson,<sup>1,7</sup> Claire T Deakin,<sup>2</sup> Georg W Otto,<sup>3,4</sup> Stefanie Dowle,<sup>3,4</sup> Chantal L Duurland,<sup>2</sup> Stuart Adams,<sup>5</sup> Emiliano Marasco,<sup>6</sup> Elizabeth C Rosser,<sup>2</sup> Anna Radziszewska,<sup>1,7</sup> Rita Carsetti,<sup>6</sup> Yiannis Ioannou,<sup>1,7</sup> Phil Beales,<sup>3,4</sup> Daniel Kelberman,<sup>3,4</sup> David A Isenberg,<sup>1,7</sup> Claudia Mauri,<sup>1</sup> ±Kiran Nistala,<sup>1</sup> ±\*Lucy R Wedderburn<sup>2,4,7</sup> on behalf of the Juvenile Dermatomyositis Research Group.

**\*Correspondence:** Professor Lucy R Wedderburn: [l.wedderburn@ucl.ac.uk](mailto:l.wedderburn@ucl.ac.uk)

## 1 Supplementary Tables

**Supplementary Table 1:** 20 most significantly expressed genes by adjusted p value in a comparison of B cells from pre-and on-treatment JDM patients. A positive log fold change signifies up-regulation and negative a down-regulation of gene expression in pre-compared to on-treatment JDM.

| hgnc_symbol | Description                                                                                                    | Log fold change | p adjusted value |
|-------------|----------------------------------------------------------------------------------------------------------------|-----------------|------------------|
| CMPK2       | cytidine/uridine monophosphate kinase 2 [Source:HGNC Symbol;Acc:HGNC:27015]                                    | 5.015845164     | 1.17E-24         |
| EIF2AK2     | eukaryotic translation initiation factor 2 alpha kinase 2 [Source:HGNC Symbol;Acc:HGNC:9437]                   | 2.204637499     | 5.82E-19         |
| RSAD2       | radical S-adenosyl methionine domain containing 2 [Source:HGNC Symbol;Acc:HGNC:30908]                          | 4.495877258     | 7.51E-19         |
| HERC6       | HECT and RLD domain containing E3 ubiquitin protein ligase family member 6 [Source:HGNC Symbol;Acc:HGNC:26072] | 2.999681795     | 1.94E-18         |
| OASL        | 2'-5'-oligoadenylate synthetase like [Source:HGNC Symbol;Acc:HGNC:8090]                                        | 5.175624818     | 3.63E-17         |
| IFI44       | interferon induced protein 44 [Source:HGNC Symbol;Acc:HGNC:16938]                                              | 3.619703923     | 6.44E-17         |
| OAS3        | 2'-5'-oligoadenylate synthetase 3 [Source:HGNC Symbol;Acc:HGNC:8088]                                           | 3.759215718     | 6.44E-17         |
| IFIT1       | interferon induced protein with tetratricopeptide repeats 1 [Source:HGNC Symbol;Acc:HGNC:5407]                 | 5.661457062     | 2.58E-16         |
| IFITM1      | interferon induced transmembrane protein 1 [Source:HGNC Symbol;Acc:HGNC:5412]                                  | 2.65927262      | 3.71E-16         |
| MX2         | MX dynamin like GTPase 2 [Source:HGNC Symbol;Acc:HGNC:7533]                                                    | 2.075976163     | 5.91E-16         |
| USP18       | ubiquitin specific peptidase 18 [Source:HGNC Symbol;Acc:HGNC:12616]                                            | 4.478369432     | 1.71E-15         |
| DDX60       | DExH/H-box helicase 60 [Source:HGNC Symbol;Acc:HGNC:25942]                                                     | 2.502981805     | 3.81E-15         |
| IFI44L      | interferon induced protein 44 like [Source:HGNC Symbol;Acc:HGNC:17817]                                         | 4.3932757       | 4.30E-15         |
| NRIR        | negative regulator of interferon response (non-protein coding) [Source:HGNC Symbol;Acc:HGNC:51269]             | 4.367969389     | 7.08E-15         |
| HERC5       | HECT and RLD domain containing E3 ubiquitin protein ligase 5 [Source:HGNC Symbol;Acc:HGNC:24368]               | 3.122510334     | 2.81E-14         |
| IFIT3       | interferon induced protein with tetratricopeptide repeats 3 [Source:HGNC Symbol;Acc:HGNC:5411]                 | 5.203493029     | 3.65E-14         |
| PLSCR1      | phospholipid scramblase 1 [Source:HGNC Symbol;Acc:HGNC:9092]                                                   | 2.422234425     | 4.44E-14         |
| IFI6        | interferon alpha inducible protein 6 [Source:HGNC Symbol;Acc:HGNC:4054]                                        | 3.059370394     | 1.51E-13         |
| SLFN5       | schlafen family member 5 [Source:HGNC Symbol;Acc:HGNC:28286]                                                   | 2.935522167     | 1.81E-13         |
| STAT1       | signal transducer and activator of transcription 1 [Source:HGNC Symbol;Acc:HGNC:11362]                         | 2.412777888     | 1.13E-12         |

**Supplementary Table 2:** 20 most significantly expressed genes by adjusted p value in a comparison of B cells from pre-treatment JDM patients and child healthy controls. A positive log fold change signifies up-regulation and negative a down-regulation of gene expression in pre-treatment JDM compared to child healthy control.

| hgnc_symbol | Description                                                                                                    | Log fold change | p adjusted value |
|-------------|----------------------------------------------------------------------------------------------------------------|-----------------|------------------|
| CMPK2       | cytidine/uridine monophosphate kinase 2 [Source:HGNC Symbol;Acc:HGNC:27015]                                    | 4.125949196     | 2.77E-07         |
| EIF2AK2     | eukaryotic translation initiation factor 2 alpha kinase 2 [Source:HGNC Symbol;Acc:HGNC:9437]                   | 2.022581215     | 2.77E-07         |
| OASL        | 2'-5'-oligoadenylate synthetase like [Source:HGNC Symbol;Acc:HGNC:8090]                                        | 5.097639577     | 8.76E-07         |
| ADAR        | adenosine deaminase, RNA specific [Source:HGNC Symbol;Acc:HGNC:225]                                            | 1.079673516     | 1.99E-06         |
| TGFBI       | transforming growth factor beta induced [Source:HGNC Symbol;Acc:HGNC:11771]                                    | -2.889143829    | 2.50E-06         |
| IFITM1      | interferon induced transmembrane protein 1 [Source:HGNC Symbol;Acc:HGNC:5412]                                  | 2.429796925     | 5.49E-06         |
| MX2         | MX dynamin like GTPase 2 [Source:HGNC Symbol;Acc:HGNC:7533]                                                    | 1.875673164     | 5.49E-06         |
| NRIR        | negative regulator of interferon response (non-protein coding) [Source:HGNC Symbol;Acc:HGNC:51269]             | 4.217600512     | 8.35E-06         |
| CD4         | CD4 molecule [Source:HGNC Symbol;Acc:HGNC:1678]                                                                | -2.522215473    | 8.35E-06         |
| HERC5       | HECT and RLD domain containing E3 ubiquitin protein ligase 5 [Source:HGNC Symbol;Acc:HGNC:24368]               | 2.967715524     | 1.16E-05         |
| HERC6       | HECT and RLD domain containing E3 ubiquitin protein ligase family member 6 [Source:HGNC Symbol;Acc:HGNC:26072] | 2.434812047     | 1.21E-05         |
| BAHCC1      | BAH domain and coiled-coil containing 1 [Source:HGNC Symbol;Acc:HGNC:29279]                                    | 3.539876725     | 1.28E-05         |
| SLFN5       | schlafen family member 5 [Source:HGNC Symbol;Acc:HGNC:28286]                                                   | 2.861670142     | 1.29E-05         |
| LGALS3BP    | galectin 3 binding protein [Source:HGNC Symbol;Acc:HGNC:6564]                                                  | 2.671699546     | 1.29E-05         |
| IL2RA       | interleukin 2 receptor subunit alpha [Source:HGNC Symbol;Acc:HGNC:6008]                                        | -2.202209619    | 1.52E-05         |
| OAS3        | 2'-5'-oligoadenylate synthetase 3 [Source:HGNC Symbol;Acc:HGNC:8088]                                           | 3.143704429     | 1.81E-05         |
| IFI44       | interferon induced protein 44 [Source:HGNC Symbol;Acc:HGNC:16938]                                              | 3.00981476      | 1.96E-05         |
| STAT1       | signal transducer and activator of transcription 1 [Source:HGNC Symbol;Acc:HGNC:11362]                         | 2.361882153     | 1.96E-05         |
| DDX60       | DExH/H-box helicase 60 [Source:HGNC Symbol;Acc:HGNC:25942]                                                     | 2.179692129     | 1.96E-05         |
| MDFIC       | MyoD family inhibitor domain containing [Source:HGNC Symbol;Acc:HGNC:28870]                                    | -1.257982447    | 3.17E-05         |

**Supplementary Table 3:** 20 most significantly expressed genes by adjusted p value in a comparison of B cells from on-treatment JDM patients and child healthy controls. A positive log fold change signifies up-regulation and negative a down-regulation of gene expression in on-treatment JDM compared to child healthy control.

| hgnc_symbol | Description                                                                             | Log fold change | p adjusted value |
|-------------|-----------------------------------------------------------------------------------------|-----------------|------------------|
| CD2         | CD2 molecule [Source:HGNC Symbol;Acc:HGNC:1639]                                         | -4.027058769    | 3.71E-06         |
| FYB         | FYN binding protein [Source:HGNC Symbol;Acc:HGNC:4036]                                  | -1.736065003    | 0.000654737      |
| CD3D        | CD3d molecule [Source:HGNC Symbol;Acc:HGNC:1673]                                        | -3.387862675    | 0.000654737      |
| UTS2        | urotensin 2 [Source:HGNC Symbol;Acc:HGNC:12636]                                         | -5.792144829    | 0.001298924      |
| CD3E        | CD3e molecule [Source:HGNC Symbol;Acc:HGNC:1674]                                        | -2.818016494    | 0.001298924      |
| BRD7        | bromodomain containing 7 [Source:HGNC Symbol;Acc:HGNC:14310]                            | -0.753749825    | 0.001298924      |
| SESN1       | sestrin 1 [Source:HGNC Symbol;Acc:HGNC:21595]                                           | -1.695533365    | 0.002503248      |
| CD4         | CD4 molecule [Source:HGNC Symbol;Acc:HGNC:1678]                                         | -2.07007882     | 0.002503248      |
| GJB6        | gap junction protein beta 6 [Source:HGNC Symbol;Acc:HGNC:4288]                          | -5.515063758    | 0.003423732      |
| GPA33       | glycoprotein A33 [Source:HGNC Symbol;Acc:HGNC:4445]                                     | -1.534820483    | 0.004655566      |
| IL7R        | interleukin 7 receptor [Source:HGNC Symbol;Acc:HGNC:6024]                               | -2.668892123    | 0.006919731      |
| Unknown     | Unknown                                                                                 | -1.737965221    | 0.006919731      |
| UNC50       | unc-50 inner nuclear membrane RNA binding protein [Source:HGNC Symbol;Acc:HGNC:16046]   | -0.632431247    | 0.014092006      |
| XIST        | X inactive specific transcript (non-protein coding) [Source:HGNC Symbol;Acc:HGNC:12810] | -3.081795412    | 0.014092006      |
| ANXA1       | annexin A1 [Source:HGNC Symbol;Acc:HGNC:533]                                            | -2.136255667    | 0.014092006      |
| EDAR        | ectodysplasin A receptor [Source:HGNC Symbol;Acc:HGNC:2895]                             | -4.629933298    | 0.024296951      |
| CRCP        | CGRP receptor component [Source:HGNC Symbol;Acc:HGNC:17888]                             | 0.684787954     | 0.024296951      |
| CCDC6       | coiled-coil domain containing 6 [Source:HGNC Symbol;Acc:HGNC:18782]                     | -0.58270338     | 0.024296951      |
| TGFBI       | transforming growth factor beta induced [Source:HGNC Symbol;Acc:HGNC:11771]             | -1.890063253    | 0.032839454      |
| CD247       | CD247 molecule [Source:HGNC Symbol;Acc:HGNC:1677]                                       | -1.466135268    | 0.035328358      |
